# Supplementary material for: Use of Real‐World Data and Physiologically‐Based Pharmacokinetic Modeling to Characterize Enoxaparin Disposition in Children With Obesity
Source: PubMed Central journal article supplement — Clin Pharmacol Ther. 2022 May 18;112(2):391–403. doi: 10.1002/cpt.2618 (PMC9504927; doi:10.1002/cpt.2618), 2022-05-18
Supplement: CPT-112-391-s001.pdf [file CPT-112-391-s001.pdf]

## SUPPLEMENTARY MATERIAL

# Use of Real-World Data and Physiologically-Based Pharmacokinetic Modeling to Characterize Enoxaparin Disposition in Children with Obesity

**Running title:** Real-World Data and PBPK Modeling of Enoxaparin in Children with Obesity

Jacqueline G. Gerhart<sup>1</sup>, Fernando O. Carreño<sup>1</sup>, Matthew Shane Loop<sup>1</sup>, Craig R. Lee<sup>1</sup>, Andrea N. Edginton<sup>2</sup>, Jaydeep Sinha<sup>1,3</sup>, Karan R. Kumar<sup>4,5</sup>, Carl M. Kirkpatrick<sup>6</sup>, Christoph P. Hornik<sup>4,5</sup>, and Daniel Gonzalez<sup>1</sup>; on behalf of the Best Pharmaceuticals for Children Act – Pediatric Trials Network Steering Committee

<sup>1</sup>Division of Pharmacotherapy and Experimental Therapeutics, UNC Eshelman School of Pharmacy, The University of North Carolina at Chapel Hill, Chapel Hill, NC, USA; <sup>2</sup>School of Pharmacy, University of Waterloo, Waterloo, ON, Canada; School of Medicine,

<sup>3</sup>Department of Pediatrics, UNC School of Medicine, The University of North Carolina at Chapel Hill, Chapel Hill, NC, USA; <sup>4</sup>Duke Clinical Research Institute, Durham, NC, USA;

<sup>5</sup>Department of Pediatrics, Duke University School of Medicine, Durham, NC, USA; <sup>6</sup>Centre for Medicine Use and Safety, Monash University, Victoria, Australia.

**Address correspondence to:** Daniel Gonzalez, UNC Eshelman School of Pharmacy, The University of North Carolina at Chapel Hill, Campus Box #7569, Chapel Hill, NC 27599-7569, USA. Tel: +1-919-966-9984; Fax: +1-919-962-0644; E-mail: [daniel.gonzalez@unc.edu](mailto:daniel.gonzalez@unc.edu).

## TABLE OF CONTENTS

|          |                                                                                      |    |
|----------|--------------------------------------------------------------------------------------|----|
| <b>1</b> | <b>SUPPLEMENTARY FIGURES</b> .....                                                   | 3  |
|          | <b>Figure S1.</b> Anti-Xa observed concentrations from RWD .....                     | 3  |
|          | <b>Figure S2.</b> Evaluation plots for mixed-effects model, treatment dosing .....   | 4  |
|          | <b>Figure S3.</b> Evaluation plots for mixed-effects model, prophylaxis dosing ..... | 5  |
|          | <b>Figure S4.</b> Adult PBPK model evaluation simulations .....                      | 7  |
|          | <b>Figure S5.</b> Pediatric PBPK model AFE plots .....                               | 8  |
|          | <b>Figure S6.</b> PBPK-simulated anti-Xa exposure, 6 to < 12 years .....             | 10 |
|          | <b>Figure S7.</b> PBPK-simulated anti-Xa exposure, 2 to < 6 years .....              | 12 |
| <b>2</b> | <b>SUPPLEMENTARY TABLES</b> .....                                                    | 14 |
|          | <b>Table S1.</b> Pediatric exclusion criteria for the RWD.....                       | 14 |
|          | <b>Table S2.</b> Baseline data for RWD children, treatment dosing.....               | 15 |
|          | <b>Table S3.</b> Baseline data for RWD children, prophylaxis dosing.....             | 18 |
|          | <b>Table S4.</b> Population demographics of simulated children.....                  | 21 |
|          | <b>Table S5.</b> Mixed-effects model parameters, prophylaxis dosing .....            | 22 |
|          | <b>Table S6.</b> Adult enoxaparin study summary .....                                | 23 |
|          | <b>Table S7.</b> Adult PBPK-simulated clearance vs. dose .....                       | 28 |
|          | <b>REFERENCES</b> .....                                                              | 29 |

# 1 SUPPLEMENTARY FIGURES

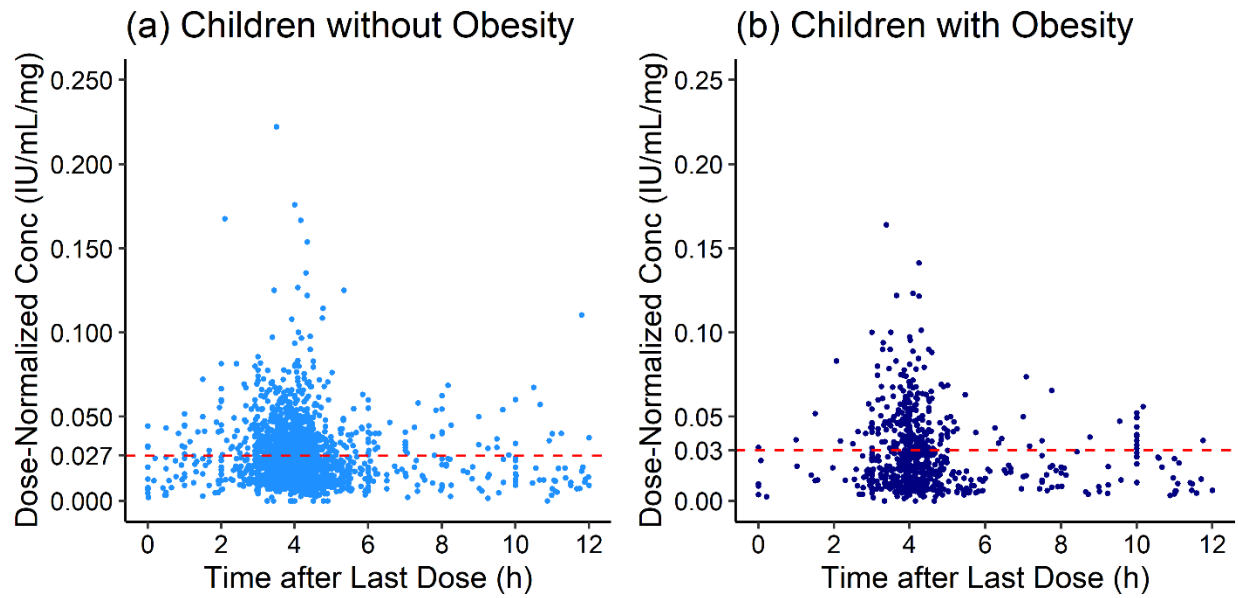

**Figure S1.** Anti-Xa dose-normalized concentration versus time after last dose for children without (a) and with (b) obesity. Dashed lines represent the mean dose-normalized anti-Xa 4-hour concentration.

Conc, concentration; IU, international unit

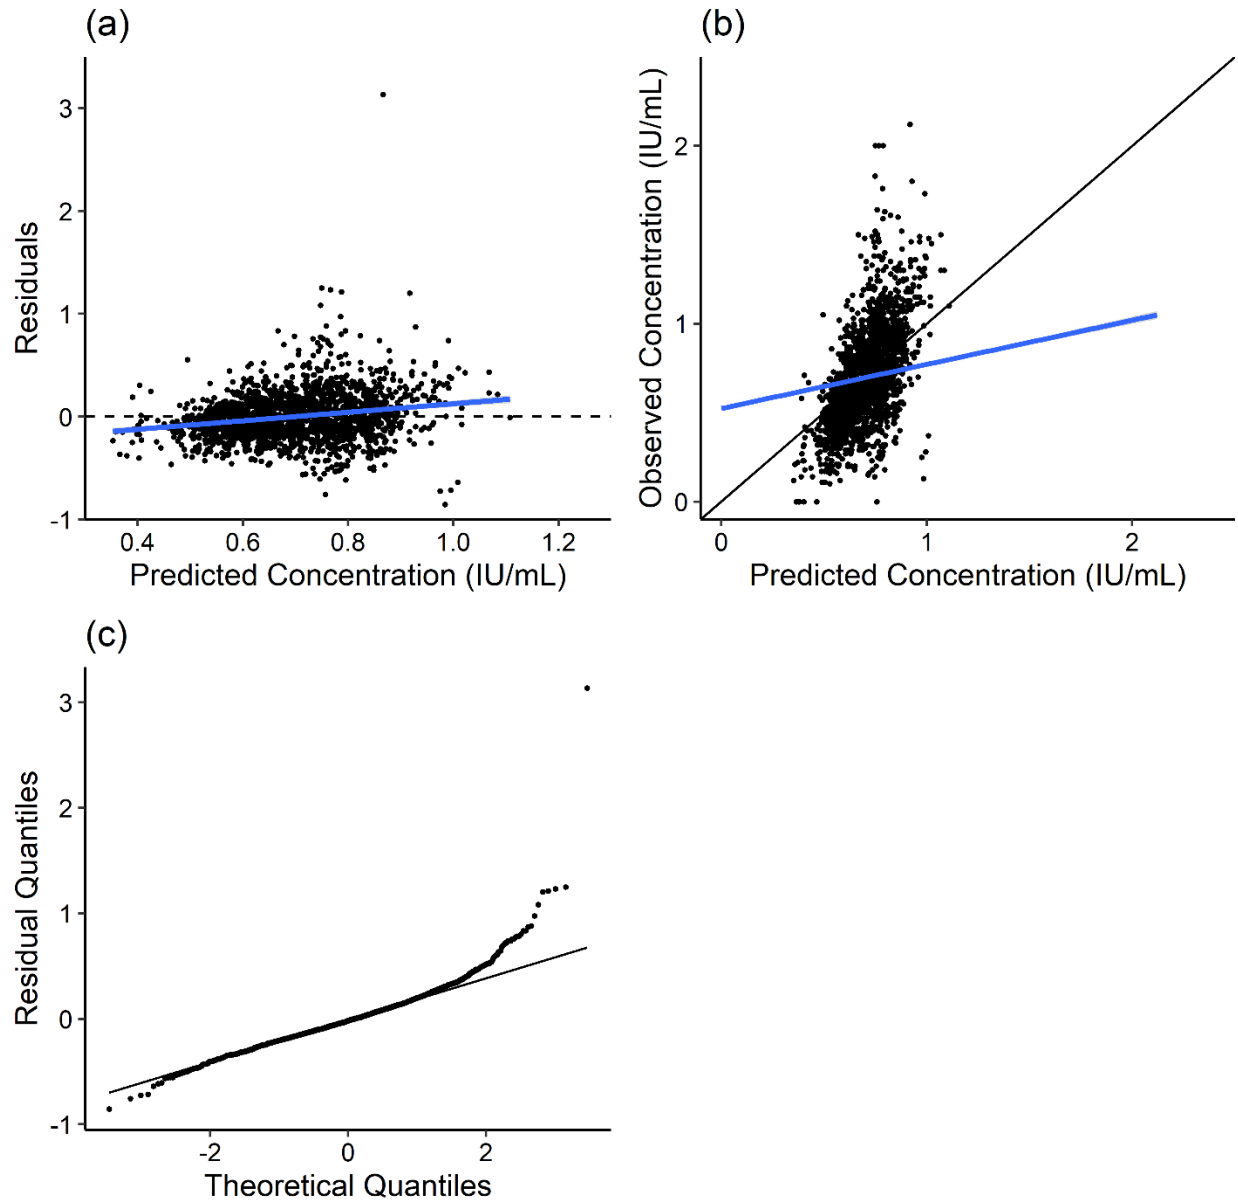

**Figure S2.** Residual (a), individual predicted versus observed concentration (b), and quantile-quantile (c) evaluation plots for a linear mixed-effects regression model of variables on anti-Xa 4-hour concentration for children receiving enoxaparin for treatment.

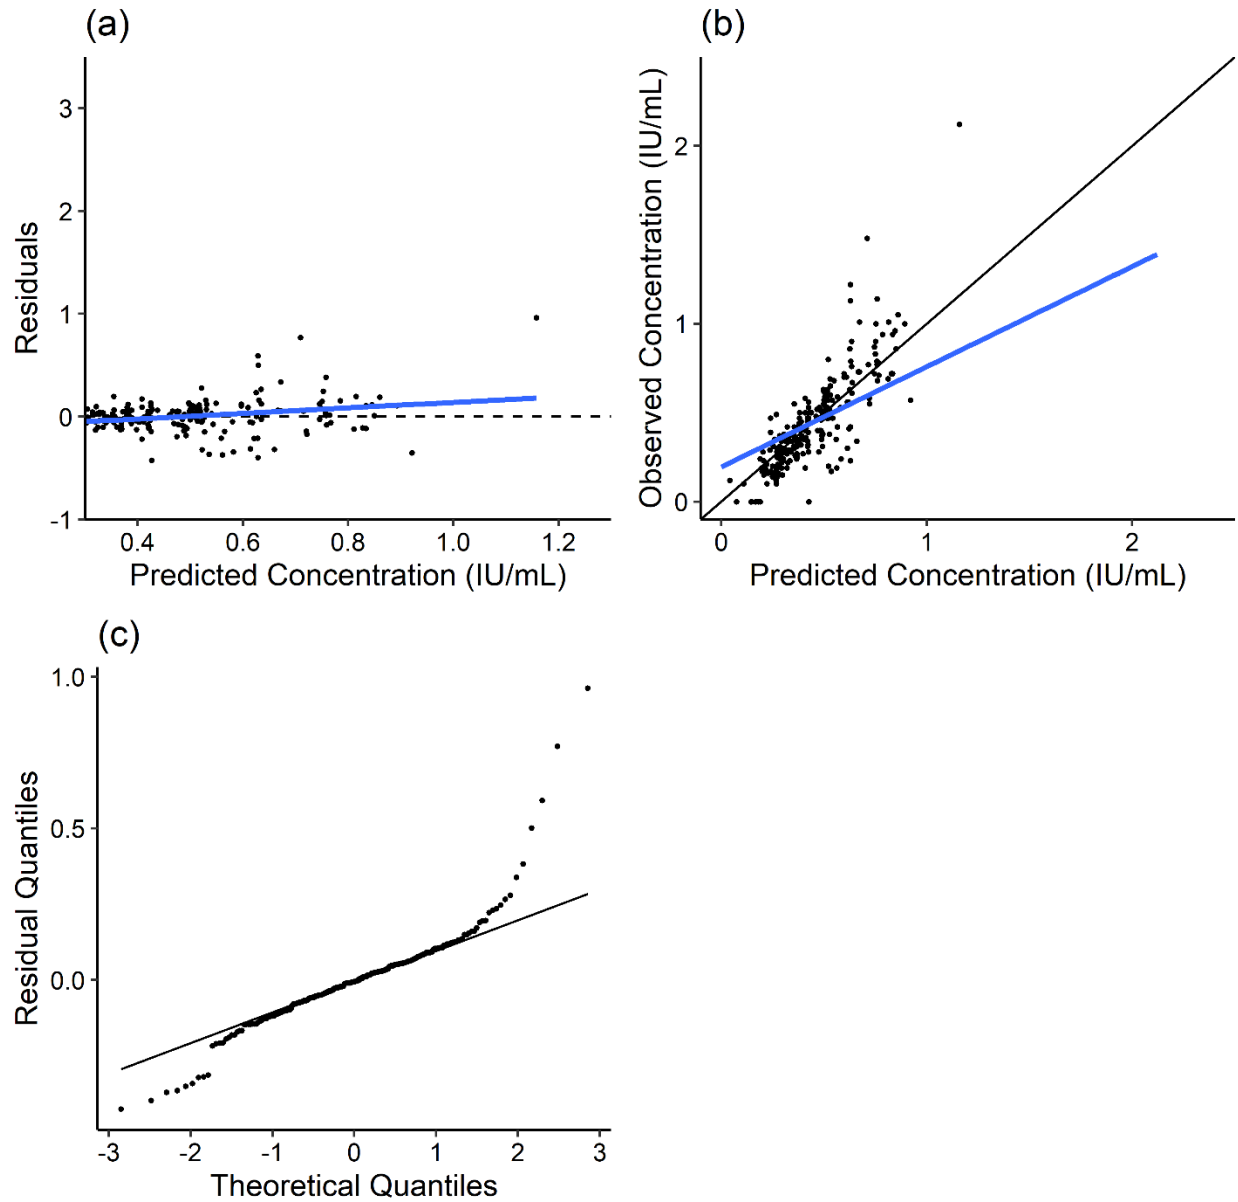

**Figure S3.** Residual (a), individual predicted versus observed concentration (b), and quantile-quantile (c) evaluation plots for a linear mixed-effects regression model of variables on anti-Xa 4-hour concentration for children receiving enoxaparin for prophylaxis.

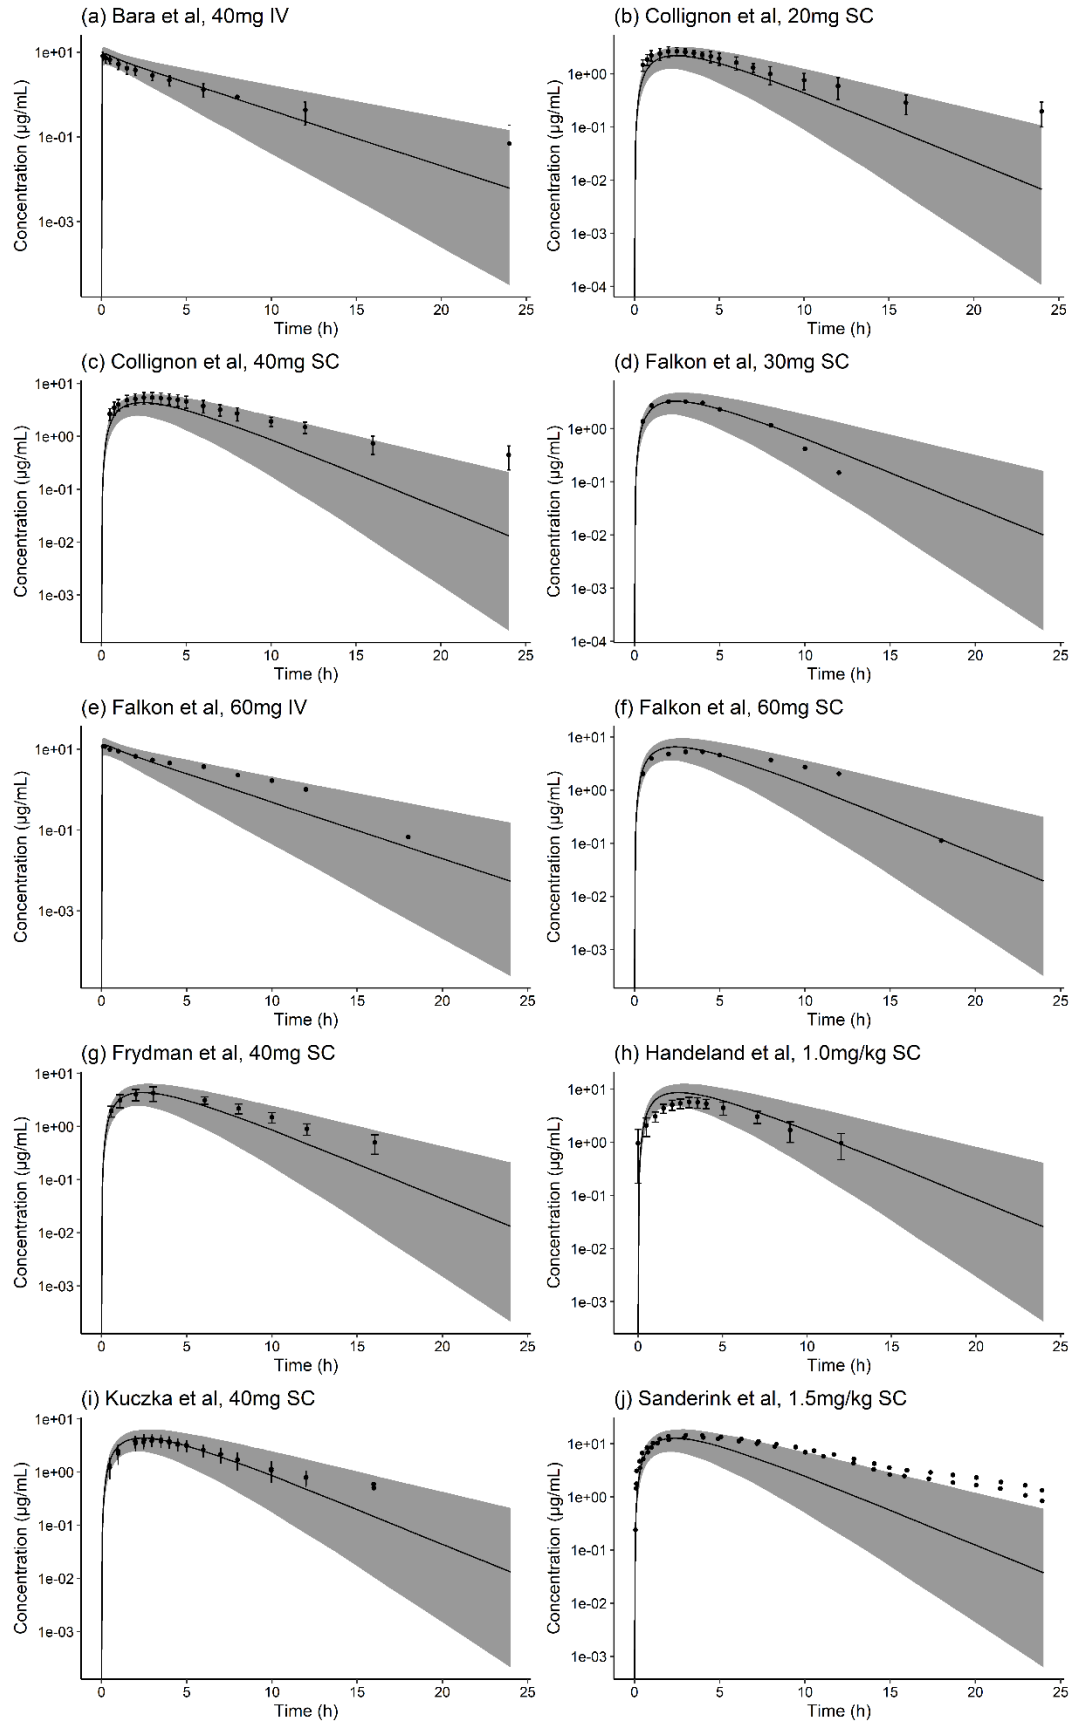

**Figure S4.** PBPK model population simulations ( $n = 500$ ) of enoxaparin concentrations digitized from adult studies. Shaded regions represent the 90% model prediction interval, and points are digitized observed enoxaparin concentrations with corresponding standard deviation values when available.

IV, intravenous; PBPK, physiologically-based pharmacokinetic; SC, subcutaneous

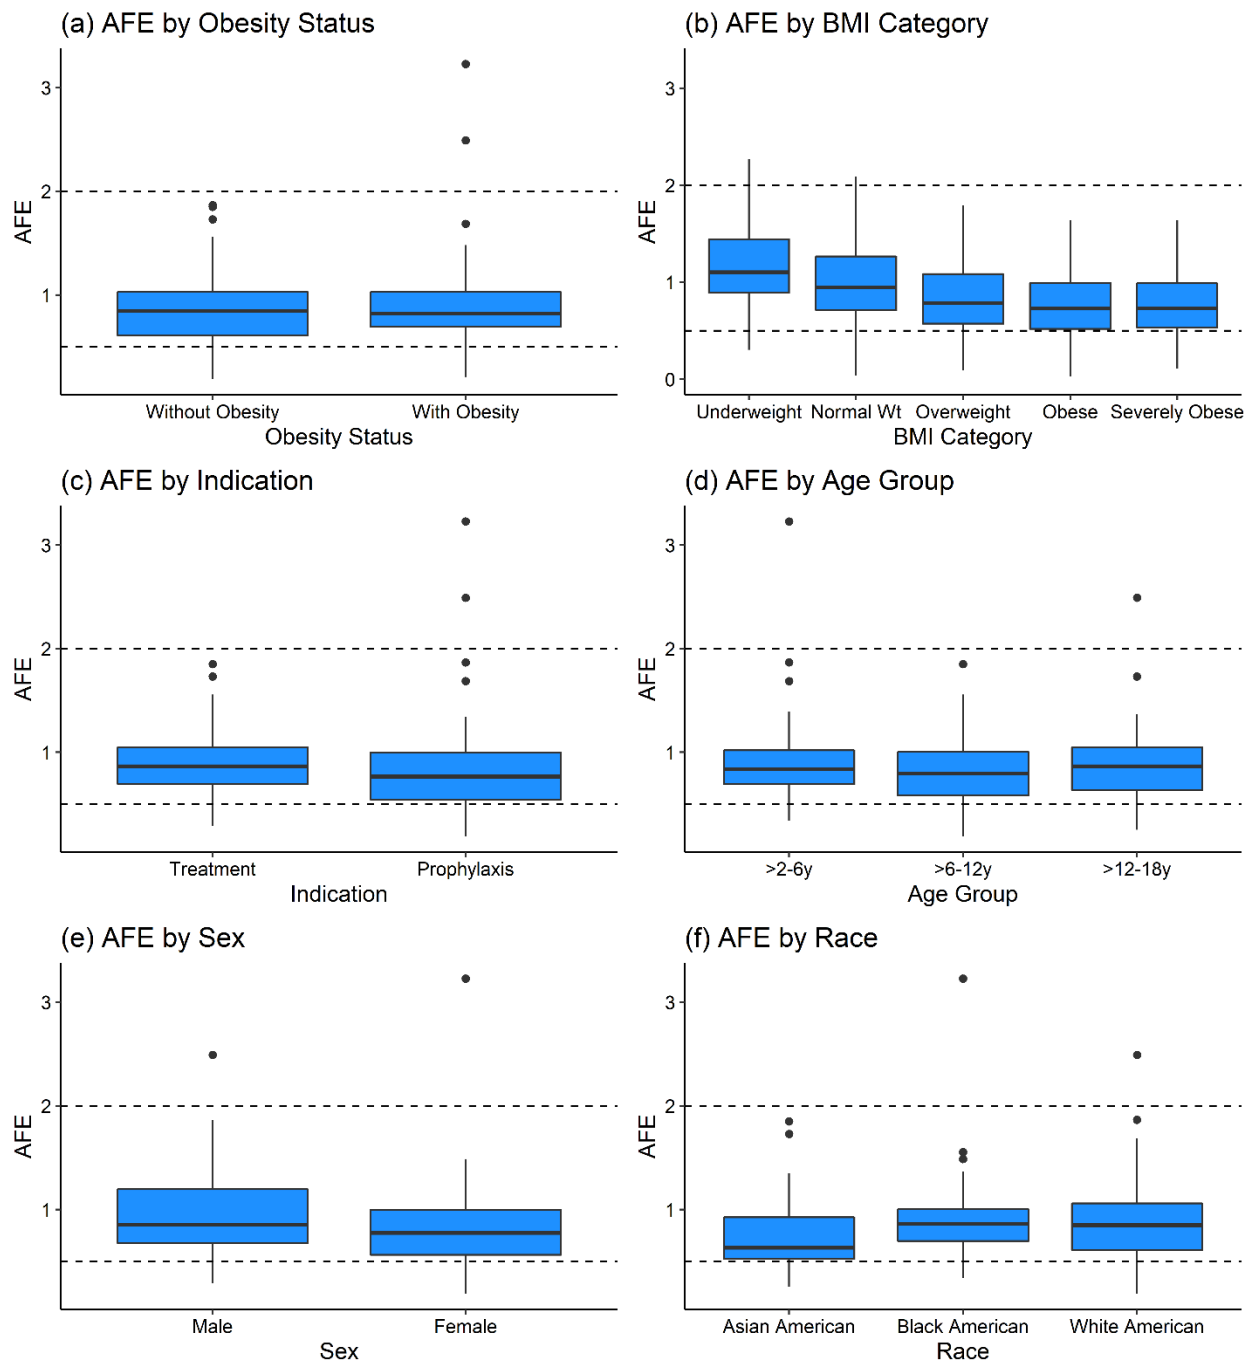

**Figure S5.** PBPK model AFE for pediatric participants from the real-world dataset versus obesity status, indication, age group, sex, and race. Dashed lines represent 2-fold error for reference. AFE was calculated using median simulated concentration. Boxes represent the median and IQR, and whiskers extend to  $1.5 \times \text{IQR}$  with further outlying values represented as points. For panel (b), children with underweight, normal weight, overweight, obesity, and severe



obesity were defined as having a BMI percentile of  $< 5\%$ ,  $\geq 5\%$  to  $85\%$ ,  $\geq 85\%$  to  $95\%$ ,  $\geq 95\%$  to  $99\%$ , and  $\geq 99\%$ , respectively.

AFE, average fold error; BMI, body mass index; IQR, interquartile range; PBPK, physiologically-based pharmacokinetic; Wt, weight

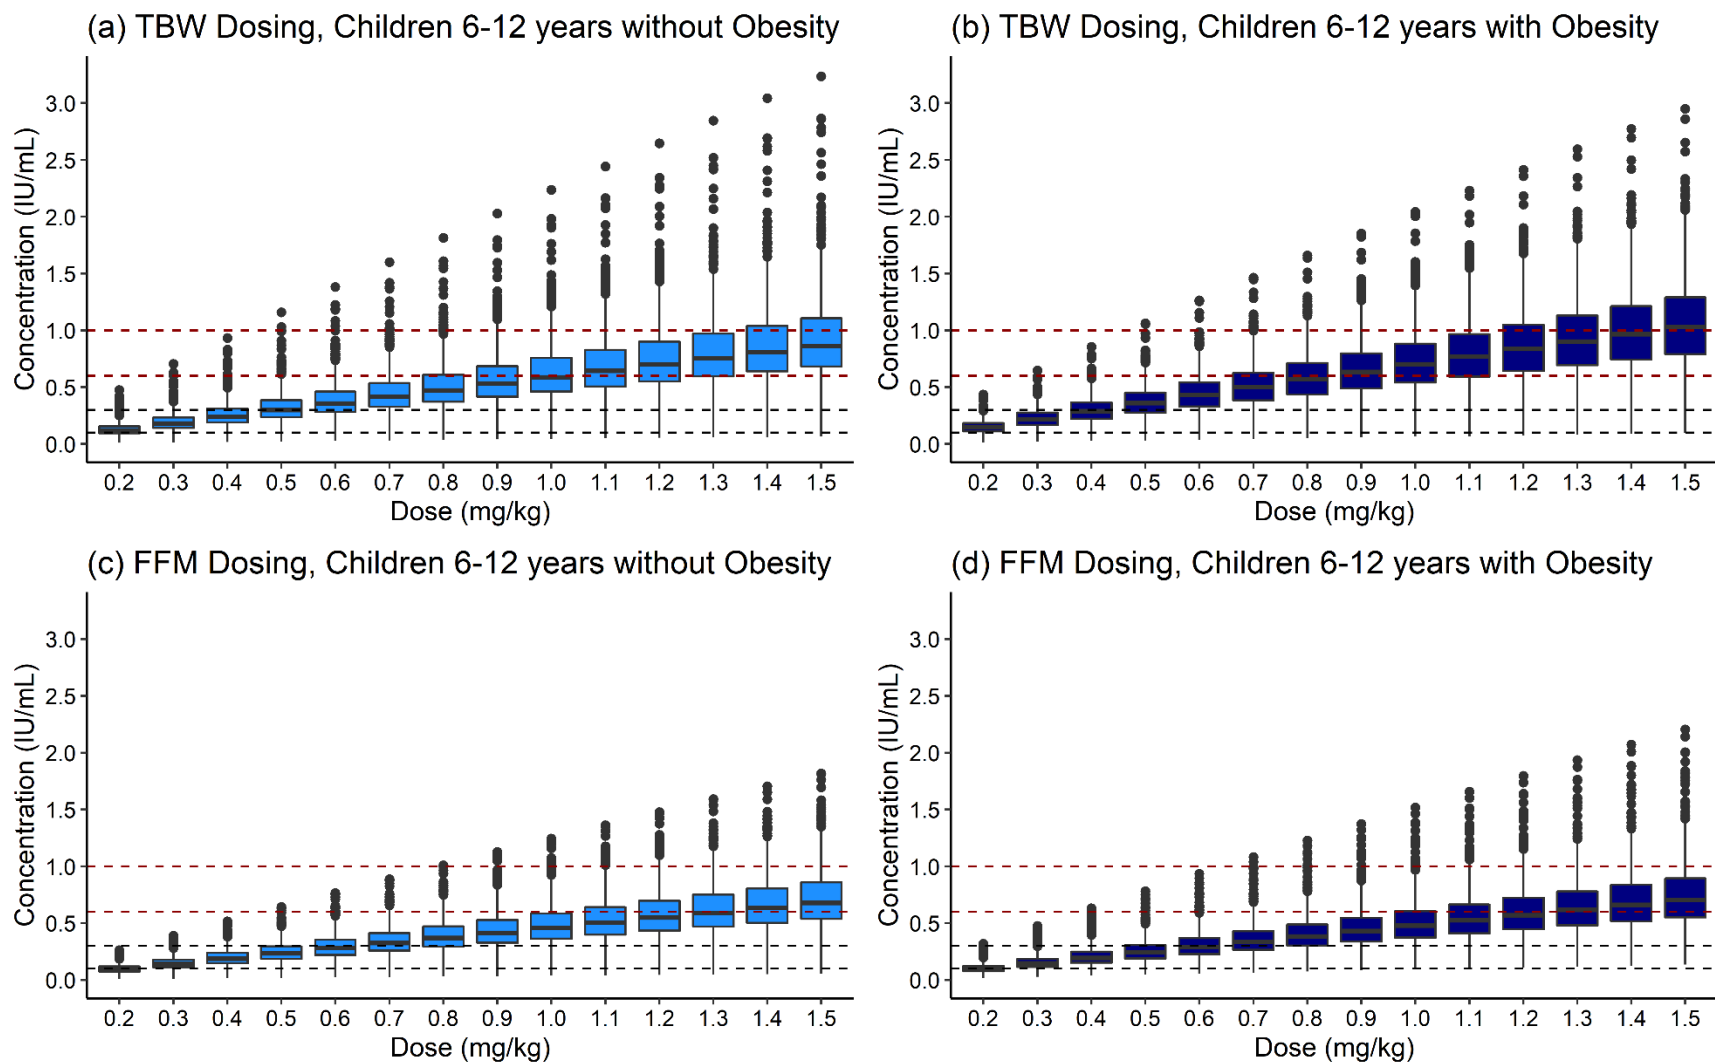

**Figure S6.** PBPK model simulated anti-Xa 4-hour concentration following twice-daily subcutaneous dosing of 0.2–1.5 mg/kg using TBW (a–b) or FFM (c–d) for children ages 6 to < 12 years without (a, c) and with (b, d) obesity (n= 1,000 children per group). Boxes

represent the median and IQR, and whiskers extend to  $1.5 \times \text{IQR}$ . Red and black dashed lines represent the target ranges for treatment (0.6–1.0 IU/mL) and prophylaxis (0.1–0.3 IU/mL) dosing, respectively.<sup>1,2</sup>

FFM, fat-free mass; PBPK, physiologically-based pharmacokinetic; TBW, total body weight

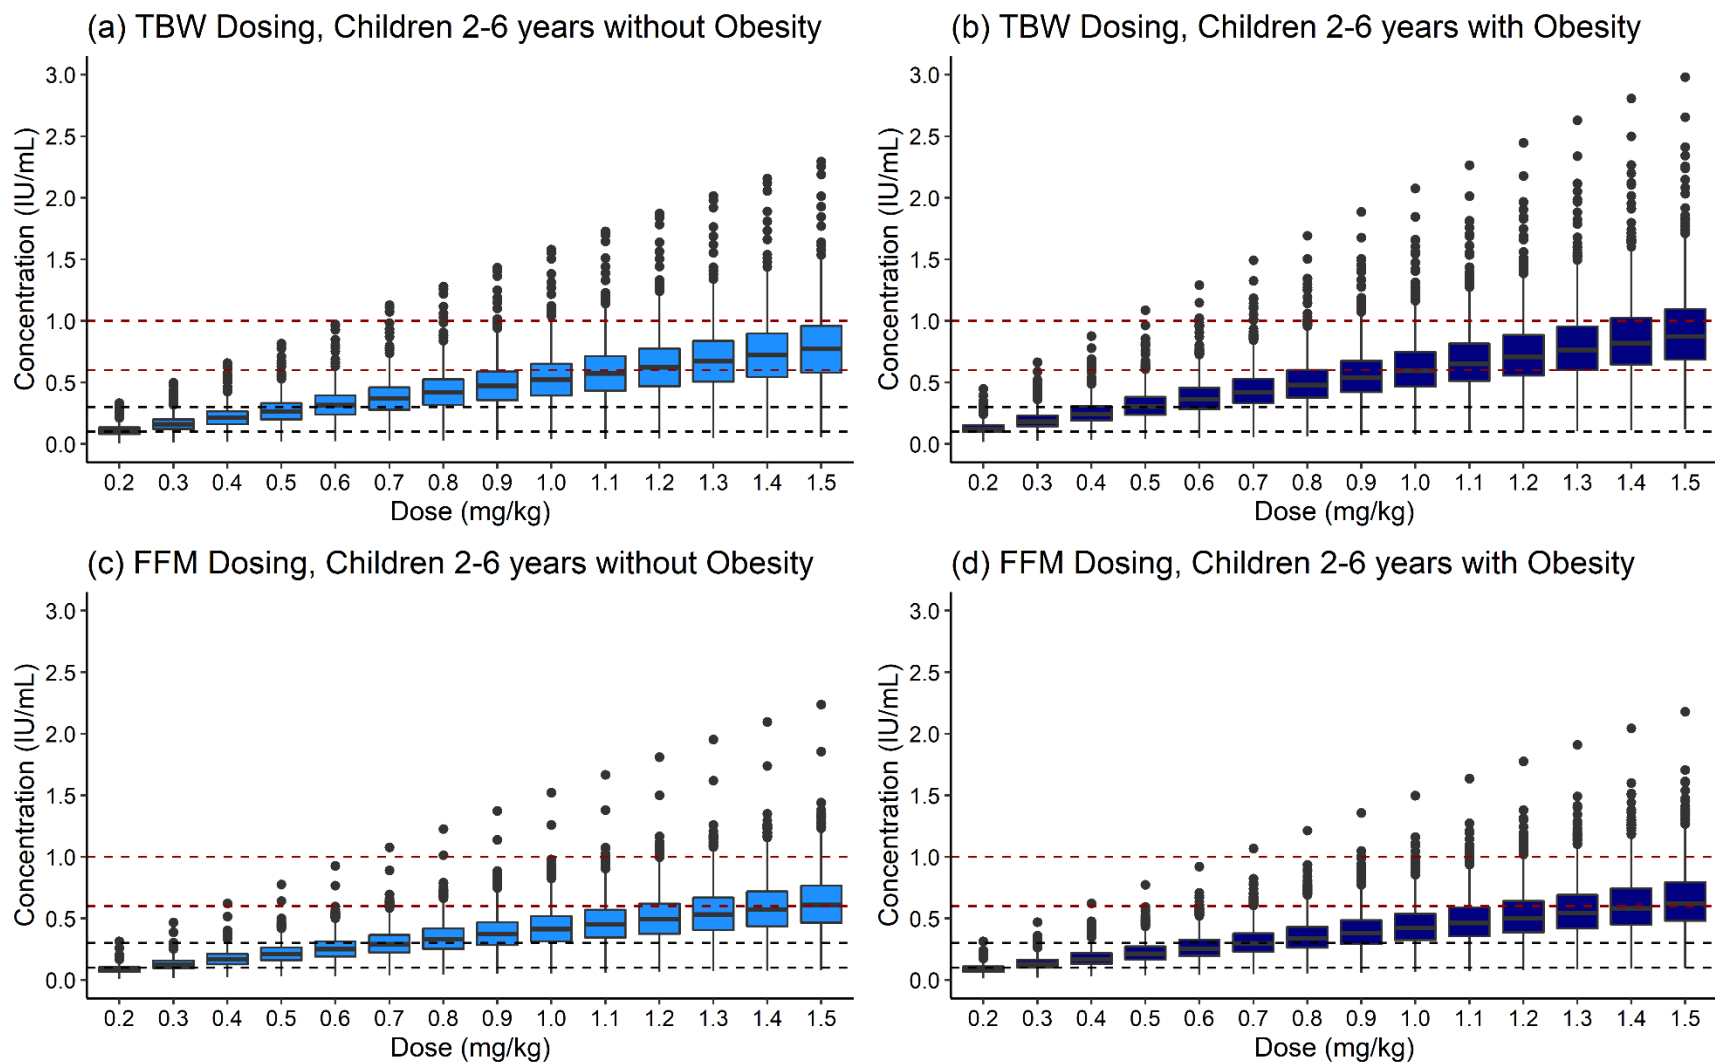

**Figure S7.** PBPK model simulated anti-Xa 4-hour concentration following twice-daily subcutaneous dosing of 0.2–1.5 mg/kg using TBW (a–b) or FFM (c–d) for children ages 2 to < 6 years without (a, c) and with (b, d) obesity (n = 1,000 children per group). Boxes

represent the median and IQR, and whiskers extend to  $1.5 \times \text{IQR}$ . Red and black dashed lines represent the target ranges for treatment (0.6–1.0 IU/mL) and prophylaxis (0.1–0.3 IU/mL) dosing, respectively.<sup>1,2</sup>

FFM, fat-free mass; PBPK, physiologically-based pharmacokinetic; TBW, total body weight

## 2 SUPPLEMENTARY TABLES

**Table S1.** Exclusion criteria applied to the real-world dataset of children receiving enoxaparin.

| <b>Starting participant count = 1,540</b> |                    |
|-------------------------------------------|--------------------|
| <b>Exclusion Criteria</b>                 | <b>N, Excluded</b> |
| On VAD                                    | 4                  |
| On ECMO                                   | 19                 |
| On dialysis                               | 23                 |
| Neoplasm diagnosis                        | 158                |
| No height recorded                        | 286                |
| No anti-Xa concentration recorded         | 378                |
| Only baseline sample(s)                   | 13                 |
| Extended TALD samples (> 80 hours)        | 18                 |
| Implausible height or BMI record          | 45                 |
| <b>Ending participant count = 596</b>     |                    |

BMI, body mass index; ECMO, extracorporeal membrane oxygenation; TALD, time after last dose; VAD, ventricular assist device

**Table S2.** Comparison of site distribution, laboratory measures, and concomitant medications for children with versus without obesity receiving enoxaparin for treatment.

| <b>Parameter <sup>a</sup></b>                                         | <b>Children <i>without</i> Obesity<br/>(n = 415)</b> | <b>Children <i>with</i> Obesity<br/>(n = 104)</b> | <b>P-value <sup>b</sup></b> |
|-----------------------------------------------------------------------|------------------------------------------------------|---------------------------------------------------|-----------------------------|
| <b>SITE</b>                                                           |                                                      |                                                   |                             |
| Site 1                                                                | 86 (20.7%)                                           | 24 (23.1%)                                        | 0.31                        |
| Site 2                                                                | 210 (50.6%)                                          | 47 (45.2%)                                        |                             |
| Site 3                                                                | 53 (12.8%)                                           | 19 (18.3%)                                        |                             |
| Site 4                                                                | 13 (3.1%)                                            | 6 (5.8%)                                          |                             |
| Site 5                                                                | 30 (7.2%)                                            | 4 (3.8%)                                          |                             |
| Site 6                                                                | 23 (5.5%)                                            | 4 (3.8%)                                          |                             |
| <b>LABORATORY MEASURES</b>                                            |                                                      |                                                   |                             |
| Hemoglobin (g/dL)                                                     | 11.3 (2.0) (7.5%)                                    | 11.1 (2.0) (9.6%)                                 | 0.31                        |
| Hematocrit (%)                                                        | 33.8 (5.8) (7.5%)                                    | 33.7 (5.5) (9.6%)                                 | 0.66                        |
| Platelets (thousands/ $\mu$ L)                                        | 281 (145) (7.7%)                                     | 274 (149) (9.6%)                                  | 0.997                       |
| INR                                                                   | 1.27 (0.32) (26.7%)                                  | 1.24 (0.25) (37.5%)                               | 0.33                        |
| BUN (mg/dL)                                                           | 13.5 (7.9) (10.6%)                                   | 14.4 (10.0) (37.5%)                               | 0.57                        |
| Serum creatinine (mg/dL)                                              | 0.49 (0.36) (10.4%)                                  | 0.51 (0.28) (13.5%)                               | 0.38                        |
| CL <sub>creatinine</sub> (mL/minute/1.73m <sup>2</sup> ) <sup>c</sup> | 138.1 (51.5) (10.1%)                                 | 123.2 (37.0) (12.5%)                              | <b>0.001 *</b>              |
| Absolute CL <sub>creatinine</sub> (mL/minute) <sup>d</sup>            | 84.0 (41.2) (10.1%)                                  | 90.8 (45.9) (12.5%)                               | 0.07                        |
| Total bilirubin (mg/dL)                                               | 0.77 (0.96) (30.1%)                                  | 0.69 (0.53) (41.3%)                               | 0.43                        |
| Direct bilirubin (mg/dL)                                              | 0.53 (1.00) (65.3%)                                  | 0.30 (0.31) (75.0%)                               | 0.06                        |

|                                |                     |                     |      |
|--------------------------------|---------------------|---------------------|------|
| Indirect bilirubin (mg/dL)     | 0.41 (0.54) (75.9%) | 0.33 (0.45) (85.6%) | 0.42 |
| <b>CONCOMITANT MEDICATIONS</b> |                     |                     |      |
| Aspirin                        | 96 (22.6%)          | 25 (21.0%)          | 0.39 |
| Bivalirudin                    | 5 (1.2%)            | 1 (0.8%)            | 1.00 |
| Heparin                        | 162 (38.1%)         | 27 (22.7%)          | 0.27 |
| Rivaroxaban                    | 2 (0.4%)            | 0 (0%)              | 1.00 |
| Steroids                       | 146 (34.4%)         | 50 (42.0%)          | 0.09 |
| Warfarin                       | 51 (12.0%)          | 10 (8.4%)           | 0.31 |

\* Statistically significant at the  $\alpha = 0.05$  level.

<sup>a</sup> Summary statistics are reported as mean (standard deviation) (% missing) for continuous variables and as count (%) for categorical variables. Laboratory measure summary statistics were calculated using each participant's average value across all encounters. Concomitant medications were tallied if the participant experienced it during any encounter.

<sup>b</sup> Continuous variables were compared using Welch's t-tests, while categorical variables were compared using Pearson's  $\chi^2$  tests. A p-value  $< 0.05$  is considered statistically significant. The results were similar when using Mann-Whitney U/Wilcoxon rank-sum tests, after testing for normality using Shapiro-Wilk, Kolmogorov-Smirnov, and Levene's tests (results not shown).

<sup>c</sup> Estimated by the Bedside Schwartz equation (creatinine clearance =  $0.41 \times \text{height [cm]} / \text{serum creatinine [mg/dL]}$ )

<sup>d</sup> Estimated by multiplying the estimated creatinine clearance by the Bedside Schwartz equation by BSA, as calculated by the Haycock equation ( $\text{BSA} = \text{weight [kg]}^{0.5378} \times \text{height [cm]}^{0.3964} \times 0.024265$ ), then dividing by 1.73.



BUN, blood urea nitrogen; BSA, body surface area;  $CL_{\text{creatinine}}$ , creatinine clearance; INR, international normalized ratio; IQR, interquartile range

**Table S3.** Comparison of site distribution, laboratory measures, and concomitant medications for children with versus without obesity receiving enoxaparin for prophylaxis.

| <b>Parameter <sup>a</sup></b>                                         | <b>Children <i>without</i> Obesity<br/>(n = 78)</b> | <b>Children <i>with</i> Obesity<br/>(n = 41)</b> | <b>P-value <sup>b</sup></b> |
|-----------------------------------------------------------------------|-----------------------------------------------------|--------------------------------------------------|-----------------------------|
| <b>SITE</b>                                                           |                                                     |                                                  |                             |
| Site 1                                                                | 15 (19.2%)                                          | 15 (36.6%)                                       | 0.08                        |
| Site 2                                                                | 34 (43.6%)                                          | 12 (29.3%)                                       |                             |
| Site 3                                                                | 4 (5.1%)                                            | 6 (14.6%)                                        |                             |
| Site 4                                                                | 3 (3.8%)                                            | 2 (4.9%)                                         |                             |
| Site 5                                                                | 14 (17.9%)                                          | 3 (7.3%)                                         |                             |
| Site 6                                                                | 8 (10.3%)                                           | 3 (7.3%)                                         |                             |
| <b>LABORATORY MEASURES</b>                                            |                                                     |                                                  |                             |
| Hemoglobin (g/dL)                                                     | 10.8 (2.0) (7.7%)                                   | 10.7 (1.7) (7.3%)                                | 0.60                        |
| Hematocrit (%)                                                        | 32.2 (5.6) (7.7%)                                   | 32.3 (5.9) (7.3%)                                | 0.89                        |
| Platelets (thousands/ $\mu$ L)                                        | 268 (117) (7.7%)                                    | 277 (149) (7.3%)                                 | 0.76                        |
| INR                                                                   | 1.21 (0.16) (41.0%)                                 | 1.25 (0.29) (51.2%)                              | 0.83                        |
| BUN (mg/dL)                                                           | 13.6 (6.9) (6.4%)                                   | 18.1 (18.0) (7.3%)                               | 0.09                        |
| Serum creatinine (mg/dL)                                              | 0.51 (0.41) (6.4%)                                  | 0.72 (0.51) (7.3%)                               | < <b>0.01</b> *             |
| CL <sub>creatinine</sub> (mL/minute/1.73m <sup>2</sup> ) <sup>c</sup> | 153.5 (89.0) (6.4%)                                 | 113.7 (48.9) (7.3%)                              | < <b>0.001</b> *            |
| Absolute CL <sub>creatinine</sub> (mL/minute) <sup>d</sup>            | 106.8 (78.4) (6.4%)                                 | 113.1 (58.4) (7.3%)                              | 0.40                        |
| Total bilirubin (mg/dL)                                               | 0.79 (0.92) (23.1%)                                 | 0.96 (2.15) (34.1%)                              | 0.64                        |
| Direct bilirubin (mg/dL)                                              | 0.57 (1.20) (62.8%)                                 | 0.87 (1.62) (85.4%)                              | 0.52                        |

|                                |                     |                     |      |
|--------------------------------|---------------------|---------------------|------|
| Indirect bilirubin (mg/dL)     | 0.31 (0.32) (74.4%) | 0.67 (0.59) (92.7%) | 0.16 |
| <b>CONCOMITANT MEDICATIONS</b> |                     |                     |      |
| Aspirin                        | 21 (26.3%)          | 15 (31.9%)          | 0.29 |
| Bivalirudin                    | 0 (0%)              | 0 (0%)              | ---  |
| Heparin                        | 19 (23.8%)          | 12 (25.5%)          | 0.99 |
| Rivaroxaban                    | 0 (0%)              | 0 (0%)              | ---  |
| Steroids                       | 31 (38.8%)          | 21 (44.7%)          | 1.00 |
| Warfarin                       | 5 (6.3%)            | 4 (8.5%)            | 1.00 |

\* Statistically significant at the  $\alpha = 0.05$  level.

<sup>a</sup> Summary statistics are reported as mean (standard deviation) (% missing) for continuous variables and as count (%) for categorical variables. Laboratory measure summary statistics were calculated using each participant's average value across all encounters. Concomitant medications were tallied if the participant experienced it during any encounter.

<sup>b</sup> Continuous variables were compared using Welch's t-tests, while categorical variables were compared using Pearson's  $\chi^2$  tests. A p-value  $< 0.05$  is considered statistically significant. The results were similar when using Mann-Whitney U/Wilcoxon rank-sum tests, after testing for normality using Shapiro-Wilk, Kolmogorov-Smirnov, and Levene's tests (results not shown).

<sup>c</sup> Estimated by the Bedside Schwartz equation (creatinine clearance =  $0.41 \times \text{height [cm]} / \text{serum creatinine [mg/dL]}$ )

<sup>d</sup> Estimated by multiplying the estimated creatinine clearance by the Bedside Schwartz equation by BSA, as calculated by the Haycock equation ( $\text{BSA} = \text{weight [kg]}^{0.5378} \times \text{height [cm]}^{0.3964} \times 0.024265$ ), then dividing by 1.73.

BUN, blood urea nitrogen; BSA, body surface area;  $CL_{\text{creatinine}}$ , creatinine clearance; INR, international normalized ratio; IQR, interquartile range

**Table S4.** Population demographics for simulated participants with and without obesity who were used in enoxaparin PBPK model dosing simulations.

| <b>Demographics</b>      | <b>Children without Obesity</b> | <b>Children with Obesity <sup>a</sup></b> |
|--------------------------|---------------------------------|-------------------------------------------|
| Age (years)              | 8.9 (2.0, 18.0)                 | 9.0 (2.0, 18.0)                           |
| Age group                |                                 |                                           |
| ≥ 2 and < 6 years        | 1,000 (33.3%)                   | 1,000 (33.3%)                             |
| ≥ 6 and < 12 years       | 1,000 (33.3%)                   | 1,000 (33.3%)                             |
| ≥ 12 years               | 1,000 (33.3%)                   | 1,000 (33.3%)                             |
| Weight (kg)              | 32.1 (9.5, 102.5)               | 45.1 (10.6, 179.1)                        |
| Height (cm)              | 135.8 (76.8, 200.2)             | 135.6 (74.4, 200.1)                       |
| BMI (kg/m <sup>2</sup> ) | 17.6 (11.5, 29.7)               | 24.9 (17.9, 65.8)                         |
| BMI percentile (%)       | 68.3 (0, < 95.0)                | 98.1 (95.0 100.0)                         |
| Extended BMI (%)         | 83.3 (53.0, < 100.0)            | 110.5 (100.0, 236.4)                      |
| Male                     | 1,500 (50.0%)                   | 1,500 (50.0%)                             |

Values are medians (range) for continuous variables and counts (%) for categorical variables. Extended BMI is calculated as the participant’s BMI divided by the 95<sup>th</sup> BMI percentile for a participant’s age and sex, where children with an extended BMI ≥100% are considered obese.

<sup>a</sup> Simulated children with obesity were generated using a virtual population with increased overall body weight as determined by updated BMI-for-age growth curves and increased lean body weight, organ volume, blood flow, and corresponding effects on clearance processes as previously described.<sup>3</sup>

BMI, body mass index; PBPK, physiologically-based pharmacokinetic

**Table S5.** Parameters for a linear mixed-effects regression model regressing anti-Xa 4-hour concentration onto key variables for children receiving enoxaparin for prophylaxis.<sup>a</sup>

| <b>Parameter</b>                                         | <b>Estimate<sup>b</sup></b> | <b>95% CI</b>           |
|----------------------------------------------------------|-----------------------------|-------------------------|
| Intercept (IU/mL)                                        | 0.33                        | <b>(0.22, 0.44) *</b>   |
| Age (years)                                              | -0.11                       | <b>(-0.16, -0.06) *</b> |
| Absolute dose (mg)                                       | 0.25                        | <b>(0.19, 0.30) *</b>   |
| Extended BMI (%)                                         | -0.002                      | (-0.05, 0.05)           |
| Ethnicity – Not Hispanic                                 | 0.07                        | (-0.04, 0.18)           |
| CL <sub>creatinine</sub> (mL/minute/1.73m <sup>2</sup> ) | -0.03                       | (-0.07, 0.01)           |
| Absolute dose *<br>Extended BMI                          | -0.06                       | <b>(-0.09, -0.02) *</b> |

\* Statistically significant at the  $\alpha = 0.05$  level.

<sup>a</sup> The regression model was developed using the R packages “lme4”, “mice”, and “broom.mixed”.<sup>4-6</sup>

<sup>b</sup> Variables were centered on the median value and scaled by the standard deviation. A random slope was fitted for each participant and site. Missing CL<sub>creatinine</sub> values were imputed using a predictive mean matching multiple imputation method.

BMI, body mass index; CI, confidence interval; CL<sub>creatinine</sub>, creatinine clearance

**Table S6.** Population demographics and PBPK model simulation results for digitized adult enoxaparin studies.

| <b>Demographics</b>                               | <b>Value</b>         |
|---------------------------------------------------|----------------------|
| <b>Bara <i>et al</i> (1985) <sup>7</sup></b>      |                      |
| Patient population                                | Healthy volunteers   |
| N                                                 | 8                    |
| Age (years)                                       | (21–29)              |
| Weight (kg)                                       | 70.7 ± 4             |
| Male                                              | 8 (100%)             |
| Dose                                              | 40 mg IV bolus       |
| Anti-Xa assay                                     | Amidolytic           |
| PK parameters,<br>Reported; Observed (% error)    |                      |
| t <sub>1/2</sub> (hours)                          | 4.6; 2.3 (50.0%)     |
| Cl (mL/minute)                                    | 24.2; 25.6 (5.8%)    |
| AUC (mg*minute/mL)                                | 1.16; 1.53 (31.9%)   |
| C <sub>max</sub> (µg/mL)                          | 5.5; 9.2 (67.3%)     |
| Bioavailability (%)                               | 91; 98 (7.7%)        |
| AFE                                               | 0.89                 |
| <b>Collignon <i>et al</i> (1995) <sup>8</sup></b> |                      |
| Patient population                                | Healthy volunteers   |
| N                                                 | 20                   |
| Age (years)                                       | (18–30)              |
| Weight (kg)                                       | (65–92.4)            |
| Male                                              | 20 (100%)            |
| Dose                                              | 20 mg SC<br>40 mg SC |
| Anti-Xa assay                                     | Amidolytic           |
| PK parameters,<br>Reported; Observed (% error)    |                      |

|                                                |                                        |
|------------------------------------------------|----------------------------------------|
| t <sub>1/2</sub> (hours)                       |                                        |
| 20 mg                                          | 3.95; 2.34 (40.8%)                     |
| 40 mg                                          | 4.37; 2.33 (46.7%)                     |
| CI/F (mL/minute)                               |                                        |
| 20 mg                                          | 16.67; 25.0 (50.0%)                    |
| 40 mg                                          | 13.83; 25.2 (82.2%)                    |
| AUC (mg*minute/mL)                             |                                        |
| 20 mg                                          | 1.18; 0.80 (32.2%)                     |
| 40 mg                                          | 2.74; 1.59 (42.0%)                     |
| t <sub>max</sub> (hours)                       |                                        |
| 20 mg                                          | 2.35; 2.50 (6.4%)                      |
| 40 mg                                          | 2.91; 2.50 (14.1%)                     |
| V <sub>d</sub> /F (L)                          |                                        |
| 20 mg                                          | 5.50; 4.60 (16.4%)                     |
| 40 mg                                          | 5.24; 4.64 (11.5%)                     |
| AFE                                            |                                        |
| 20 mg                                          | 0.58                                   |
| 40 mg                                          | 0.52                                   |
| <b>Falkon <i>et al</i> (1995) <sup>9</sup></b> |                                        |
| Health status                                  | Healthy volunteers                     |
| N                                              | 12                                     |
| Age (years)                                    | 28.4 ± 2.4                             |
| Weight (kg)                                    | 76.3 ± 8.9                             |
| Male                                           | 12 (100%)                              |
| Dose                                           | 60 mg IV bolus<br>30 mg SC<br>60 mg SC |
| Anti-Xa assay                                  | Amidolytic                             |
| PK parameters,<br>Reported; Observed (% error) |                                        |
| k <sub>a</sub> (1/hours)                       |                                        |



|                                                 |                     |
|-------------------------------------------------|---------------------|
| 30 mg SC                                        | 1.2; 0.6 (50.0%)    |
| 60 mg SC                                        | 0.63; 0.60 (0%)     |
| $t_{1/2}$ (hours)                               |                     |
| 60 mg IV bolus                                  | 2.5; 2.1 (16.0%)    |
| 30 mg SC                                        | 5.3; 2.3 (56.6%)    |
| 60 mg SC                                        | 5.29; 2.34 (55.8%)  |
| AUC (mg*minute/mL)                              |                     |
| 60 mg IV bolus                                  | 3.01; 2.30 (23.6%)  |
| 30 mg SC                                        | 1.21; 1.20 (0.8%)   |
| 60 mg SC                                        | 2.82; 2.35 (16.7%)  |
| $C_{max}$ ( $\mu\text{g/mL}$ )                  |                     |
| 60 mg IV bolus                                  | 13.0; 12.9 (0.8%)   |
| 30 mg SC                                        | 3.4; 3.3 (2.9%)     |
| 60 mg SC                                        | 5.4; 6.5 (20.4%)    |
| $t_{max}$ (hours)                               |                     |
| 60 mg IV bolus                                  | 0.05; 0.15 (200.0%) |
| 30 mg SC                                        | 2–3; 2.5            |
| 60 mg SC                                        | 3–4; 2.3            |
| $V_d$ (L)                                       |                     |
| 60 mg IV bolus                                  | 5.1; 4.7 (7.8%)     |
| Bioavailability (%)                             |                     |
| 30 mg                                           | 81.1; 98.0 (20.8%)  |
| 60 mg                                           | 95.6; 99.0 (1.0%)   |
| AFE                                             |                     |
| 60 mg IV bolus                                  | 0.67                |
| 30 mg SC                                        | 1.11                |
| 60 mg SC                                        | 0.87                |
| <b>Frydman <i>et al</i> (1996)<sup>10</sup></b> |                     |
| Patient population                              | Healthy volunteers  |
| N                                               | 41                  |
| Age (years)                                     | NR                  |

|                                                                     |                                      |
|---------------------------------------------------------------------|--------------------------------------|
| Weight (kg)                                                         | NR                                   |
| Male                                                                | NR                                   |
| Dose                                                                | 40 mg SC                             |
| Anti-Xa assay                                                       | NR                                   |
| PK parameters<br>Reported; Observed (% error)<br>$t_{1/2}$ (hours)  | 5.2; 2.3 (55.8%)                     |
| AFE                                                                 | 0.72                                 |
| <b>Handeland <i>et al</i> (1990) <sup>11</sup></b>                  |                                      |
| Patient population                                                  | Deep venous thromboembolism patients |
| N                                                                   | 15                                   |
| Age (years)                                                         | (20–90)                              |
| Weight (kg)                                                         | (48–90)                              |
| Male                                                                | 6 (40%)                              |
| Dose                                                                | 1.0 mg/kg SC                         |
| Anti-Xa assay                                                       | Chromogenic                          |
| PK parameters,<br>Reported; Observed (% error)<br>$t_{1/2}$ (hours) | 3.0; 2.3 (23.3%)                     |
| AFE                                                                 | 0.95                                 |
| <b>Kuczka <i>et al</i> (2008) <sup>12</sup></b>                     |                                      |
| Patient population                                                  | Healthy volunteers                   |
| N                                                                   | 20                                   |
| Age (years)                                                         | (27–37)                              |
| Weight (kg)                                                         | (66–90)                              |
| Male                                                                | 10 (50%)                             |
| Dose                                                                | 40 mg SC                             |
| Anti-Xa assay                                                       | Chromogenic                          |
| PK parameters,<br>Reported; Observed (% error)                      |                                      |

|                                                   |                     |
|---------------------------------------------------|---------------------|
| AUC (mg*minute/mL)                                | 1.60; 1.59 (0.6%)   |
| C <sub>max</sub> (µg/mL)                          | 3.9; 4.4 (12.8%)    |
| t <sub>max</sub> (hours)                          | 3.1; 2.5 (19.4%)    |
| AFE                                               | 0.91                |
| <b>Sanderink <i>et al</i> (2002)<sup>13</sup></b> |                     |
| Patient population                                | Healthy volunteers  |
| N                                                 | 24                  |
| Age (years)                                       | (18–50)             |
| Weight (kg)                                       | (50.3–82.1)         |
| Male                                              | 12 (50%)            |
| Dose                                              | 1.5 mg/kg SC        |
| Anti-Xa assay                                     | Chromogenic         |
| PK parameters,<br>Reported; Observed (% error)    |                     |
| t <sub>1/2</sub> (hours)                          | 4.85; 2.33 (52.0%)  |
| AUC (mg*minute/mL)                                | 8.92; 5.02 (43.7%)  |
| C <sub>max</sub> (µg/mL)                          | 13.44; 8.63 (35.8%) |
| t <sub>max</sub> (hours)                          | 3.5; 2.3 (34.3%)    |
| AFE                                               | 0.30                |

Values shown as mean ± standard deviation (range).

AFE, average fold error; AUC, area under the concentration-versus-time curve; Cl, clearance; Cl/F, apparent subcutaneous clearance; C<sub>max</sub>, maximum concentration; IV, intravenous; k<sub>a</sub>, absorption rate constant; NR, not reported; PBPK, physiologically-based pharmacokinetic; PK, pharmacokinetic; SC, subcutaneous; t<sub>1/2</sub>, half-life; t<sub>max</sub>, time of maximum concentration; V<sub>d</sub>, volume of distribution; V<sub>d</sub>/F, apparent subcutaneous volume of distribution

**Table S7.** Mean simulated clearance in virtual adults receiving SC and IV administration of enoxaparin is dose linear.

| <b>Dose (mg)</b>     | <b>Simulated Clearance following SC Administration (mL/minute)</b> | <b>Simulated Clearance following IV Administration (mL/minute)</b> | <b>Bioavailability (%)</b> |
|----------------------|--------------------------------------------------------------------|--------------------------------------------------------------------|----------------------------|
| 20                   | 23.4                                                               | 22.9                                                               | 97.6                       |
| 30                   | 23.6                                                               | 23.1                                                               | 97.9                       |
| 40                   | 23.7                                                               | 23.3                                                               | 98.1                       |
| 60                   | 23.9                                                               | 23.6                                                               | 98.8                       |
| ≈ 80<br>(1 mg/kg)    | 24.2                                                               | 24.0                                                               | 99.4                       |
| ≈ 120<br>(1.5 mg/kg) | 24.7                                                               | 24.8                                                               | 100.0                      |

Note that the FDA label reported clearance in adults following SC and IV administration is 15 and 26 mL/minute, respectively.<sup>14</sup>

IV, intravenous; SC, subcutaneous

## REFERENCES

1. Garcia, D. A., Baglin, T. P., Weitz, J. I. & Samama, M. M. Parenteral anticoagulants - Antithrombotic therapy and prevention of thrombosis, 9th ed: American College of Chest Physicians evidence-based clinical practice guidelines. *Chest* **141**, e24S-e43S (2012).
2. Geerts, W. H. *et al.* Prevention of venous thromboembolism: American College of Chest Physicians evidence-based clinical practice guidelines (8th edition). *Chest* **133**, 381S-453S (2008).
3. Gerhart, J. G. *et al.* Development and evaluation of a virtual population of children with obesity for physiologically based pharmacokinetic modeling. *Clin. Pharmacokinet.* **61**, 307–320 (2022).
4. Bates, D., Mächler, M., Bolker, B. & Walker, S. Fitting linear mixed-effects models using lme4. *J. Stat. Softw.* **67**, (2015).
5. van Buuren, S. & Groothuis-Oudshoorn, K. mice: Multivariate imputation by chained equations in R. *J. Stat. Softw.* **45**, 1–67 (2011).
6. Bolker, B. & Robinson, D. broom.mixed: Tidying methods for mixed models. <<https://CRAN.R-project.org/package=broom.mixed>> (2021).
7. Bara, L., Billaud, E., Gramond, G., Kher, A. & Samama, M. Comparative pharmacokinetics of a low molecular weight heparin (PK 10 169) and unfractionated heparin after intravenous and subcutaneous administration. *Thromb. Res.* **39**, 631–636 (1985).
8. Collignon, F. *et al.* Comparison of the pharmacokinetic profiles of three low molecular mass heparins - dalteparin, enoxaparin and nadroparin - administered subcutaneously in healthy volunteers (doses for prevention of thromboembolism). *Thromb. Haemost.* **73**, 630–640 (1995).
9. Falkon, L. *et al.* Bioavailability and pharmacokinetics of a new low molecular weight heparin (RO-11) - A three way cross-over study in healthy volunteers. *Thromb. Res.* **78**, 77–86 (1995).

10. Frydman, A. Low-molecular-weight heparins: An overview of their pharmacodynamics, pharmacokinetics and metabolism in humans. *Haemostasis* **26**, 24–38 (1996).
11. Handeland, G. F., Abildgaard, U., Holm, H. A. & Arnesen, K.-E. Subcutaneous heparin treatment of deep venous thrombosis: A comparison of unfractionated and low molecular weight heparin. *Eur. J. Clin. Pharmacol.* **39**, 107–112 (1990).
12. Kuczka, K. *et al.* Biomarkers and coagulation tests for assessing the biosimilarity of a generic low-molecular-weight heparin: Results of a study in healthy subjects with enoxaparin. *J. Clin. Pharmacol.* **48**, 1189–1196 (2008).
13. Sanderink, G. J. *et al.* The pharmacokinetics and pharmacodynamics of enoxaparin in obese volunteers. *Clin. Pharmacol. Ther.* **72**, 308–318 (2002).
14. LOVENOX<sup>®</sup> (Enoxaparin sodium solution for injection, manufacturer's standard). <[https://pdf.hres.ca/dpd\\_pm/00047708.PDF](https://pdf.hres.ca/dpd_pm/00047708.PDF)> (2018). Accessed 27 May 2020.
